# Supplementary material for: Synthesis, crystal and electronic structure, and optical properties of two new chalcogenide-iodides: Ba3Q4I2 (Q = S, Se)
Source: Royal Society of Chemistry journal article supplement (doi:10.1039/c5qi00225g), 2015-12-11
Supplement: c5qi00225g1.pdf [file c5qi00225g1.pdf]

## ELECTRONIC SUPPORTING INFORMATION

Synthesis, crystal and electronic structure, and optical properties of two  
new chalcogenide-iodides:  $\text{Ba}_3Q_4\text{I}_2$  ( $Q = \text{S}, \text{Se}$ )

Jian Wang, Kathleen Lee, Kirill Kovnir\*

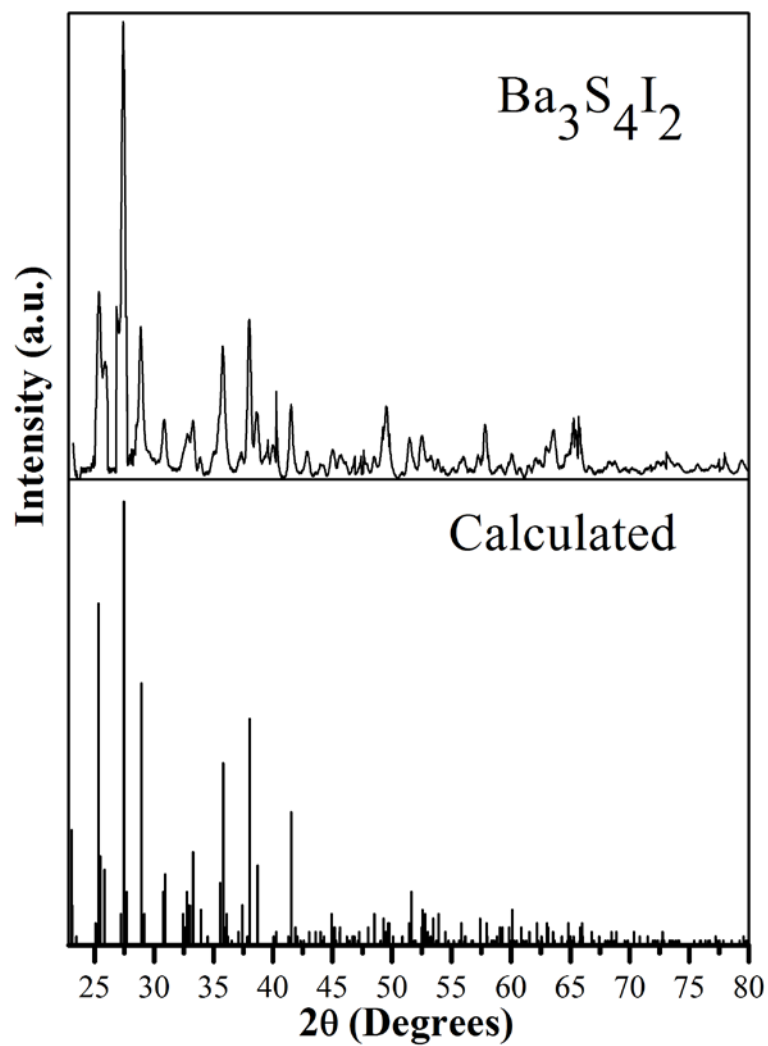

Figure S1. Experimental (top) and calculated (bottom) powder X-ray diffraction patterns for  $\text{Ba}_3\text{S}_4\text{I}_2$ .

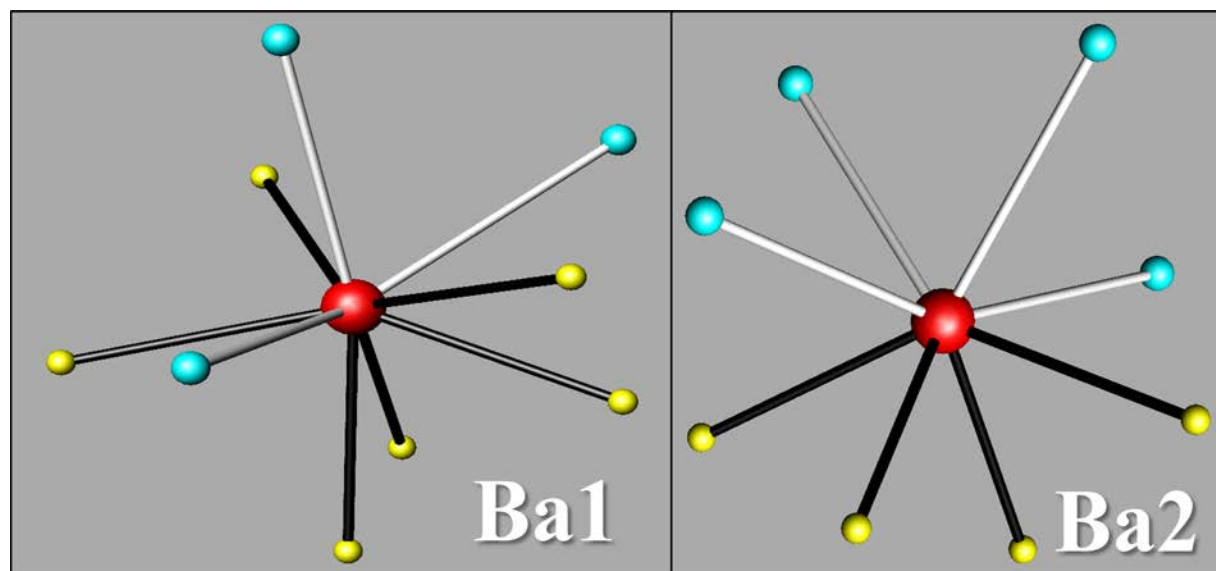

Figure S2. Coordination of the Ba1 and Ba2 atoms in the crystal structure of  $\text{Ba}_3\text{S}_4\text{I}_2$ .
